# Supplementary material
Source: Springer Nature journal article supplement (https://www.springermedizin.de/resource/supplementary/12893_2009_156_MOESM4_ESM.pdf/9511754)

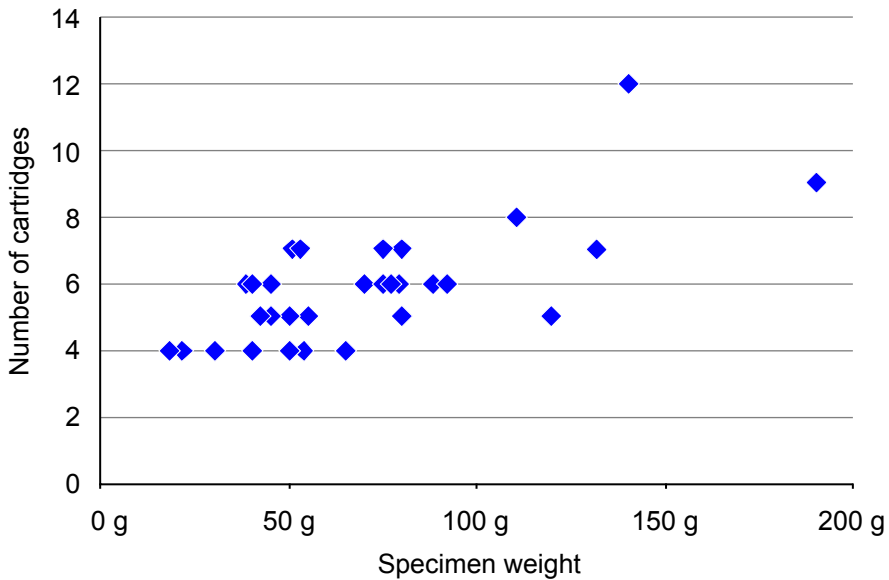

Supplement: MOESM4 [file 9511754]
